# Supplementary material
Source: publisher figshare collection journal article supplement (https://acs.figshare.com/ndownloader/files/4266727)
Supplement: Supplementary file 1 [file 4266727]

Supplementary Information for:

**A reactive Ru-binaphtholate building block with self-tuning hapticity**

*Johanna M. Blacquiere, Carolyn S. Higman, Robert McDonald<sup>†</sup> and Deryn E. Fogg\**

Center for Catalysis Research & Innovation, and Department of Chemistry, University of

Ottawa, Ottawa ON, Canada K1N 6N5

**Table of Contents:**

|        |                                                                                                                                       |
|--------|---------------------------------------------------------------------------------------------------------------------------------------|
| p.S2   | Road map for assignment of key <sup>1</sup> H and <sup>13</sup> C{ <sup>1</sup> H} NMR signals for the BINO ligand.                   |
| p. S3  | Exchange between <b>7''</b> and <b>7'</b> by <sup>31</sup> P spin saturation transfer.                                                |
| p. S4  | NMR spectra for Ru(( <i>S</i> )-BINO)(PPh <sub>3</sub> ) <sub>2</sub> <b>7</b> .                                                      |
| p. S7  | NMR spectra for Ru(η <sup>3</sup> ,η <sup>1</sup> -( <i>S</i> )-BINO)(PPh <sub>3</sub> ) <sub>2</sub> (MeCN) <b>9</b> .               |
| p. S11 | NMR spectra for Ru(η <sup>1</sup> ,η <sup>1</sup> -( <i>S</i> )-BINO)(PPh <sub>3</sub> ) <sub>2</sub> (MeCN) <sub>2</sub> <b>10</b> . |
| p. S14 | NMR spectra for Ru(η <sup>3</sup> ,η <sup>1</sup> -( <i>S</i> )-BINO)(PPh <sub>3</sub> )(py) <sub>2</sub> <b>11</b> .                 |
| p. S13 | NMR spectra for Ru(η <sup>1</sup> ,η <sup>1</sup> -( <i>S</i> )-BINO)(PPh <sub>3</sub> )(py) <sub>3</sub> <b>12</b> .                 |
| p. S18 | NMR spectra for Ru(η <sup>3</sup> ,η <sup>1</sup> -( <i>S</i> )-BINO)(PPh <sub>3</sub> ) <sub>2</sub> (=C=CH'Bu) <b>13</b> .          |

---

<sup>†</sup> X-Ray Crystallography Laboratory, Chemistry Department, University of Alberta, 11227 Saskatchewan Drive NW, Edmonton AB, Canada T6G 2G2.



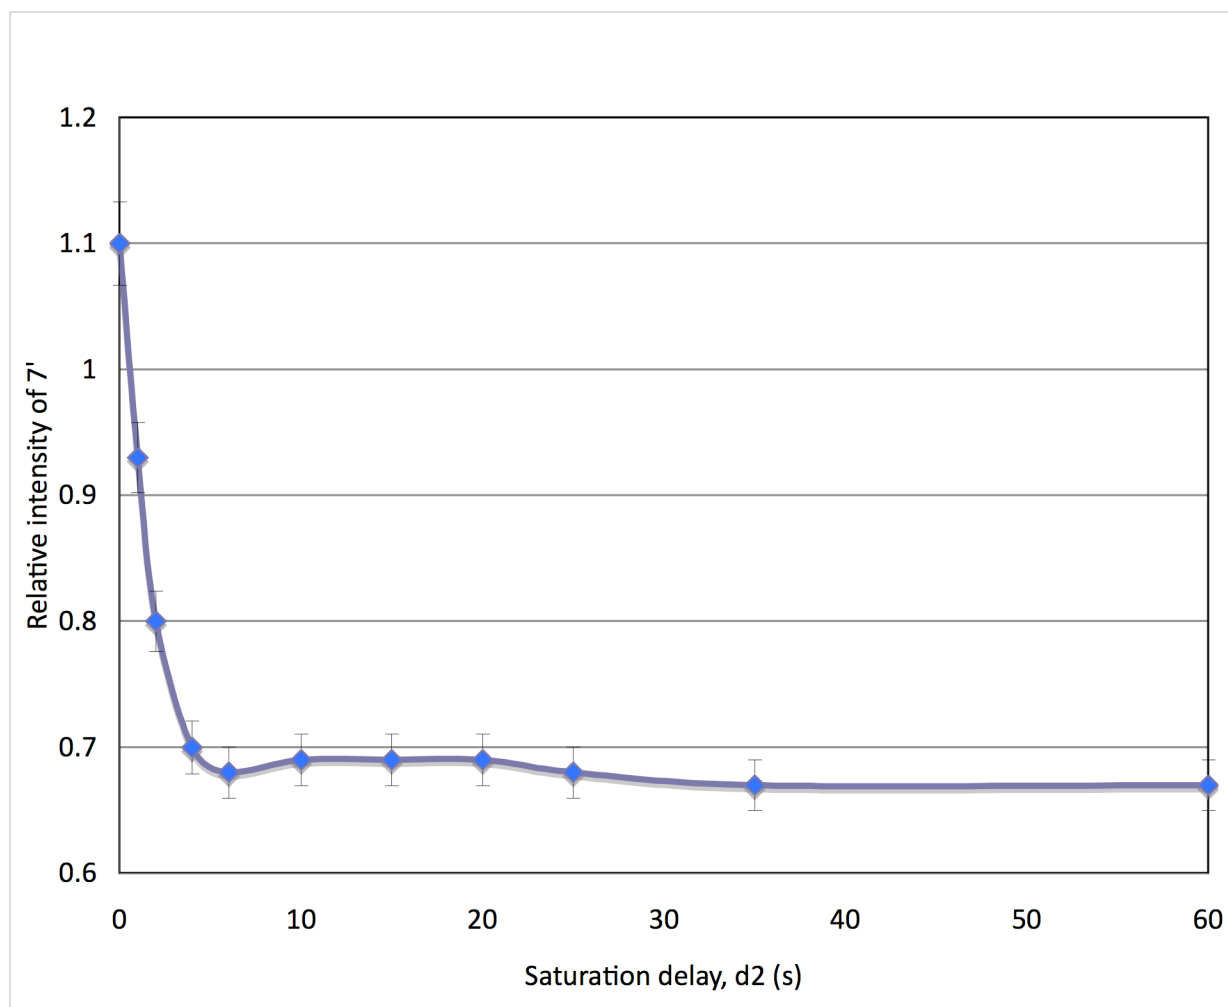

**Figure S2.**  $^{31}\text{P}$  spin saturation transfer plot: relative intensities of the signal for 7' after saturating that for 7'', as a function of the saturation delay (40 °C,  $\text{C}_6\text{D}_6$ ).

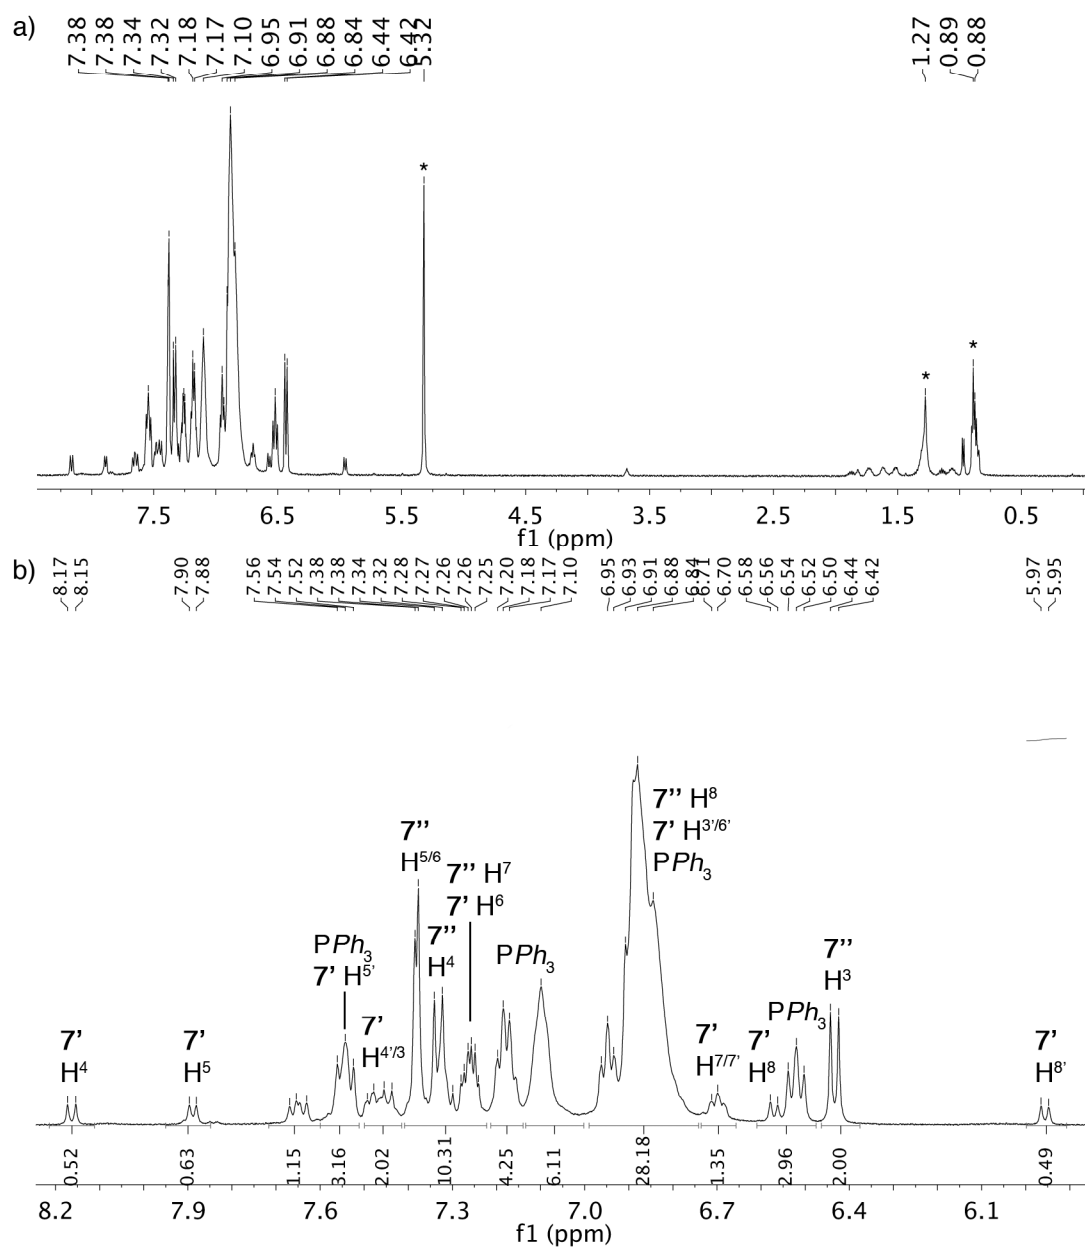

**Figure S3.**  $^1\text{H}$  NMR spectrum of **7** ( $\text{CD}_2\text{Cl}_2$ ). (a) Full spectrum; (b) expansion of the aromatic region with peak assignments. Solvent peaks are designated by (\*).

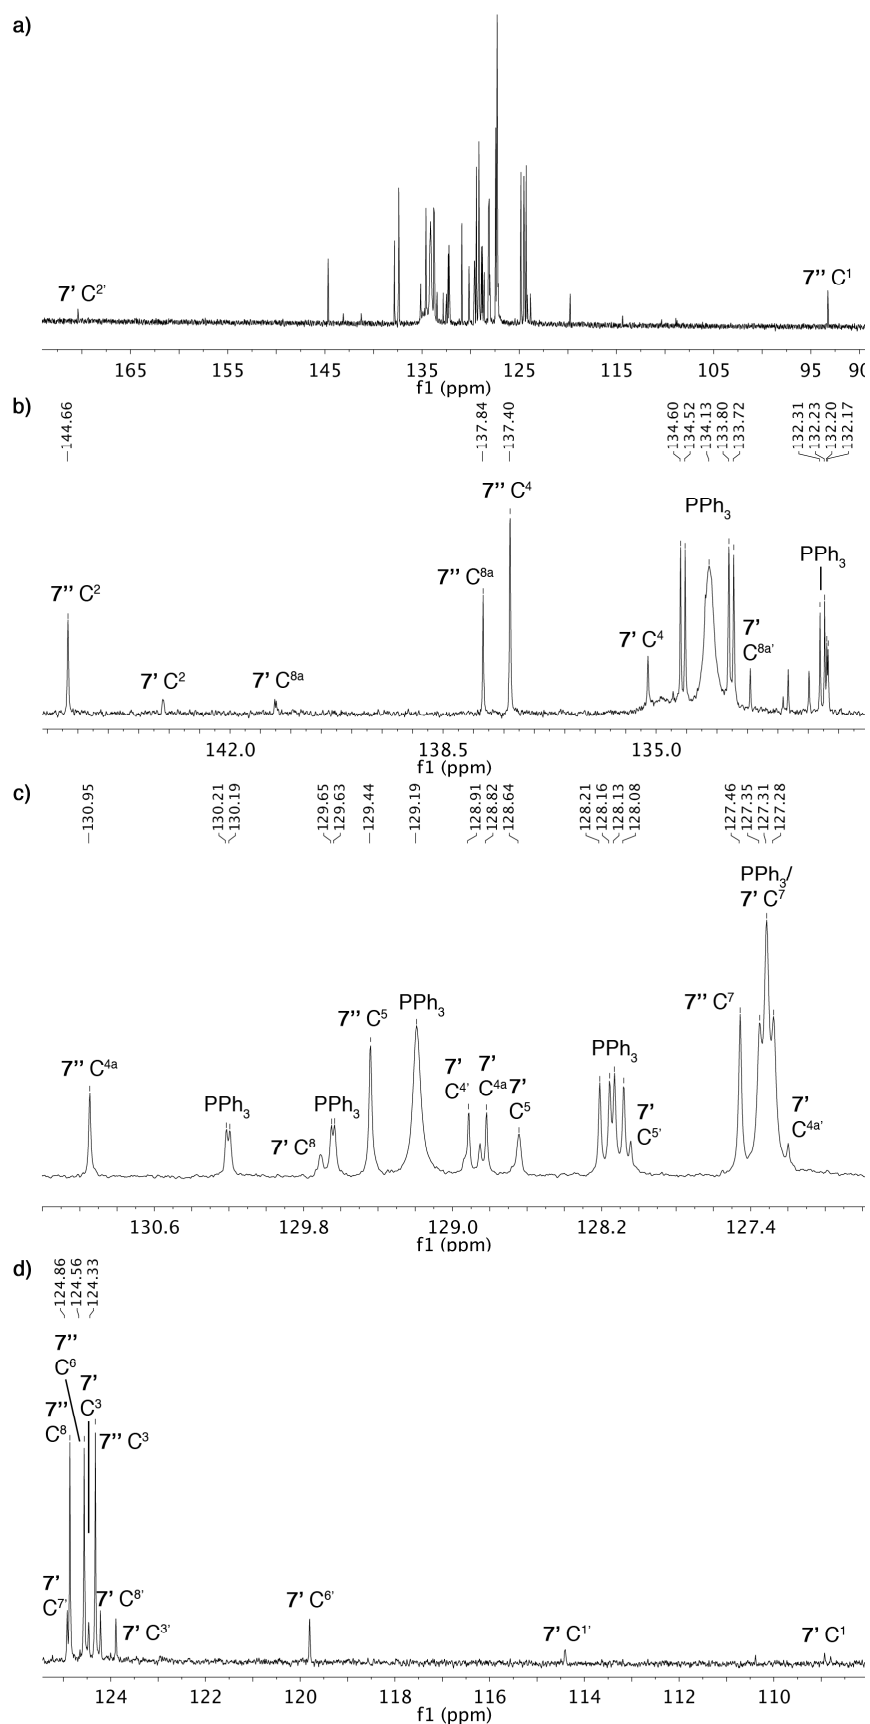

**Figure S4.**  $^{13}\text{C}\{^1\text{H}\}$  NMR spectrum of **7** ( $\text{CD}_2\text{Cl}_2$ ). (a) Full spectrum; b-d) expansions of the aromatic region with peak assignments.

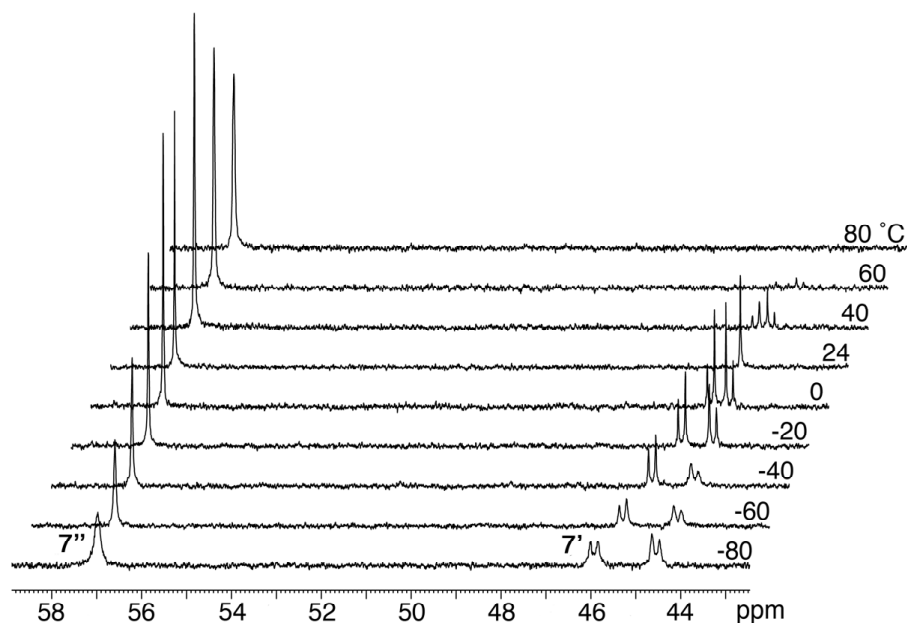

**Figure S5.** Variable-temperature  $^{31}\text{P}\{^1\text{H}\}$  NMR spectra of **7** ( $\text{CD}_2\text{Cl}_2$ ). At 24 °C, **7''** appears at 56.9 ppm, **7'** at 43.5 ppm.

**Table S1.** Proportions of **7''** and **7'** in common solvents.<sup>a</sup>

| Solvent                  | Relative % |           |
|--------------------------|------------|-----------|
|                          | <b>7''</b> | <b>7'</b> |
| $\text{CDCl}_3$          | 100        | 0         |
| $\text{CD}_2\text{Cl}_2$ | 79         | 21        |
| $\text{C}_7\text{D}_8$   | 73         | 27        |
| $\text{C}_6\text{D}_6$   | 67         | 33        |
| THF                      | 53         | 47        |
| THF <sup>b</sup>         | 54         | 46        |

<sup>a</sup> Determined from relative  $^{31}\text{P}\{^1\text{H}\}$  NMR integration values. <sup>b</sup> After 5 h in solution.

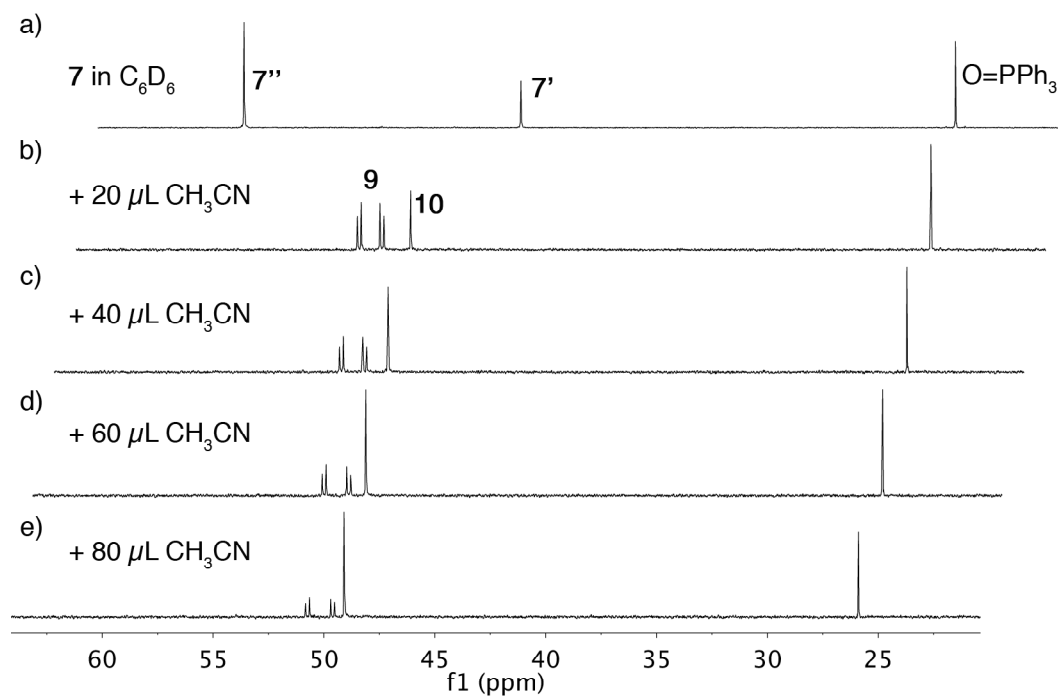

**Figure S6.**  $^{31}\text{P}\{^1\text{H}\}$  NMR spectra showing transformation of **7** ( $\text{C}_6\text{D}_6$ ) into **9** and **10** on addition of MeCN. Ratios of **9:10** as a function of added  $\text{CH}_3\text{CN}$  are as follows: (b) 3:1; (c) 1.1:1; (d) 1:1.3; (e) 1:2.  $\text{OPPh}_3$  used as internal standard.

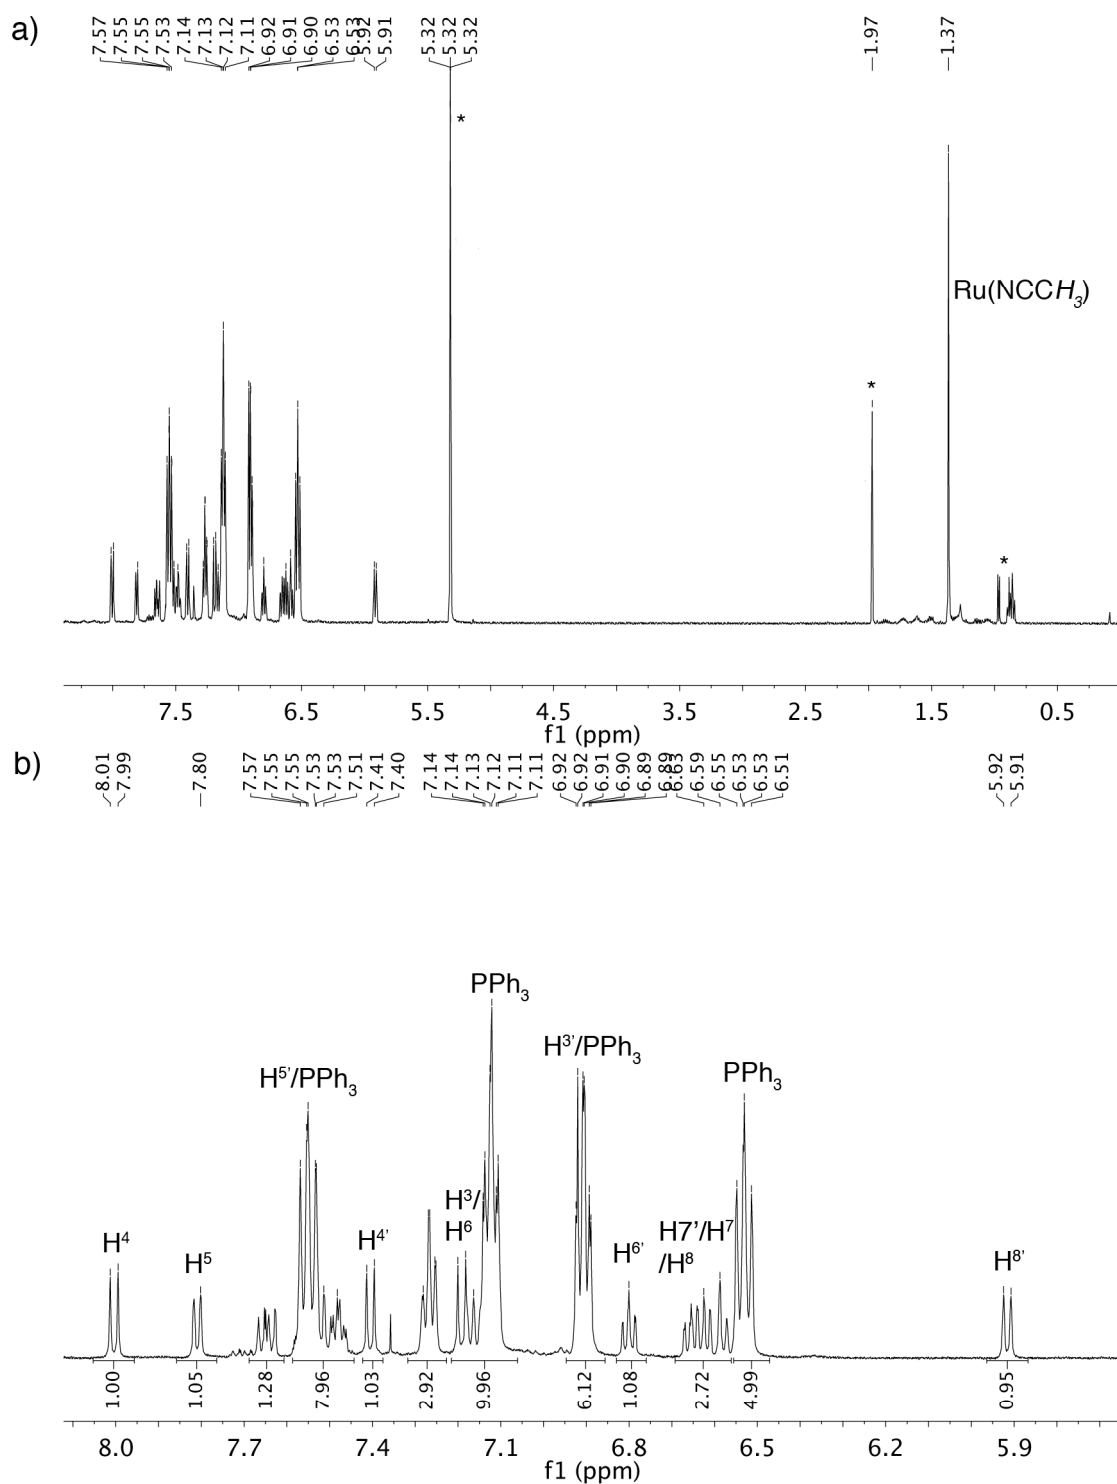

**Figure S7.**  $^1\text{H}$  NMR spectrum of **9** ( $\text{CD}_2\text{Cl}_2$ ). (a) Full spectrum; (b) expansion of the aromatic region with peak assignments. Solvent peaks are designated by (\*).



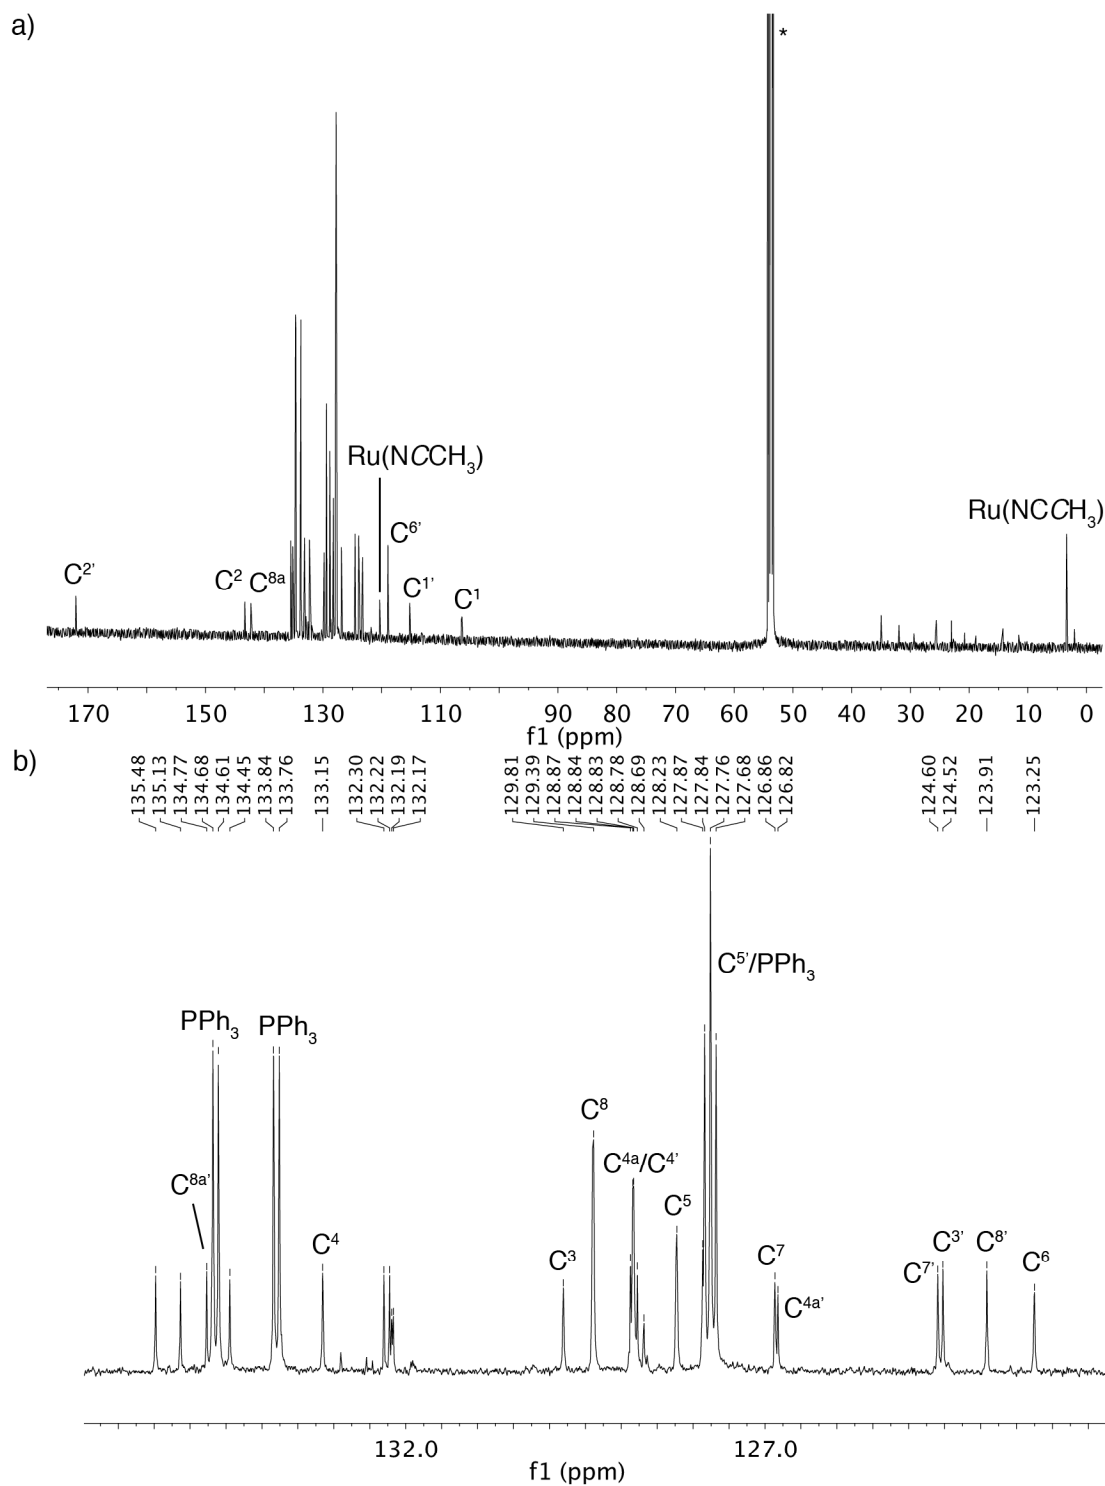

**Figure S8.**  $^{13}\text{C}\{^1\text{H}\}$  NMR spectrum of **9** ( $\text{CD}_2\text{Cl}_2$ ). (a) Full spectrum; (b) expansion of the aromatic region, showing peak assignments. Unassigned signals are due to  $\text{OPPh}_3$ ; residual solvent signals are designated (\*).

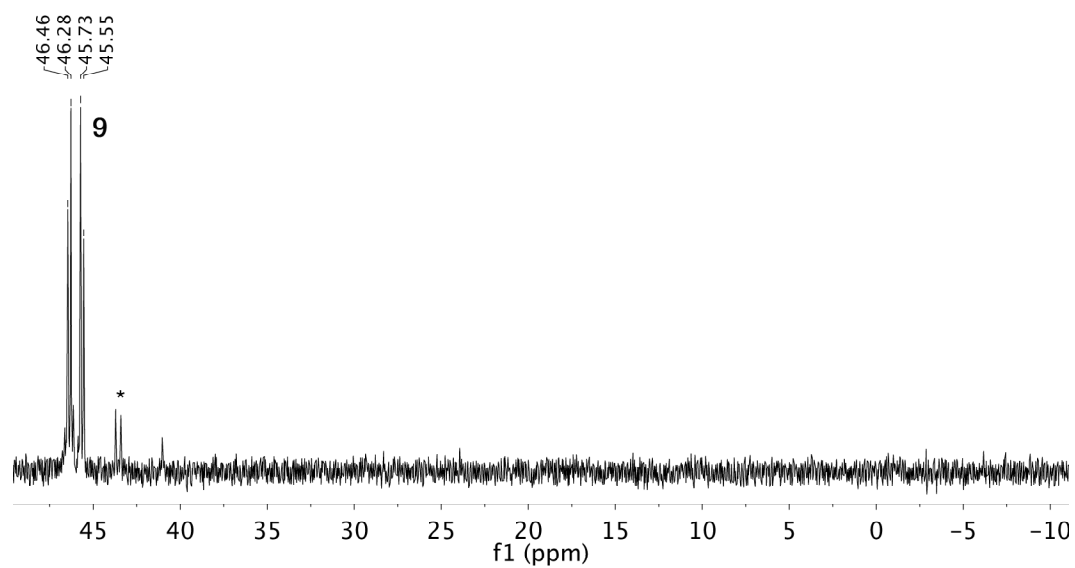

**Figure S9.**  $^{31}\text{P}\{^1\text{H}\}$  NMR spectrum of **9** ( $\text{CD}_2\text{Cl}_2$ ). Unassigned signals are designated by (\*).

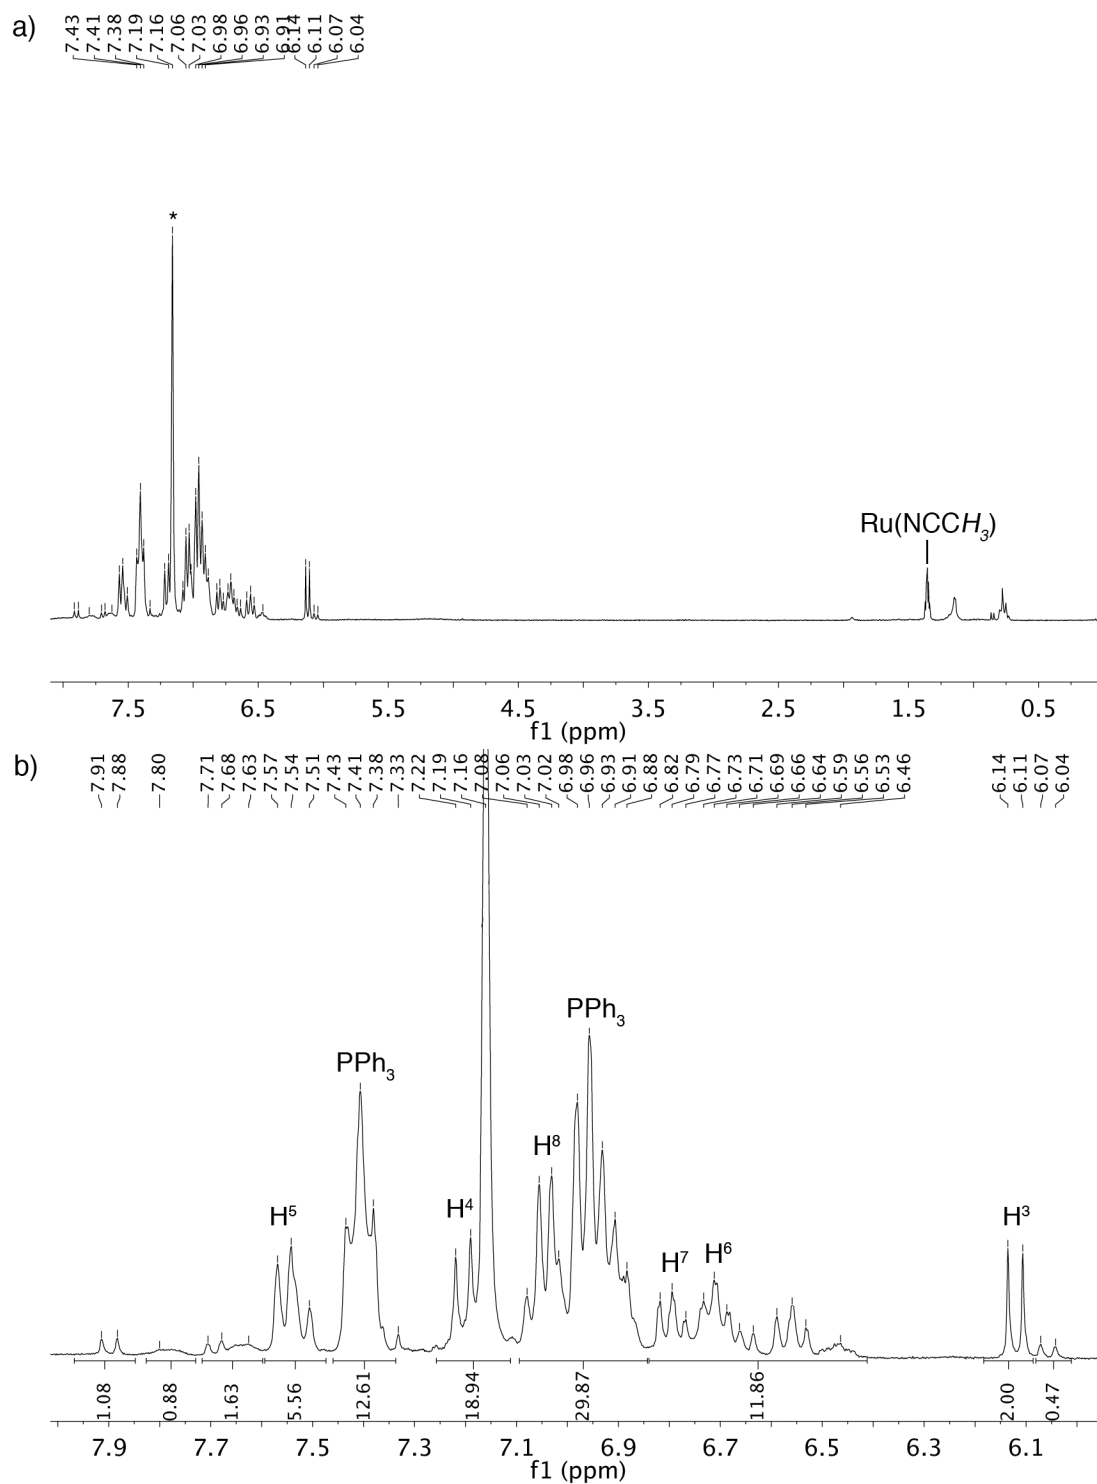

**Figure S10.** <sup>1</sup>H NMR spectrum of **10** (1:2 CD<sub>3</sub>CN-C<sub>6</sub>D<sub>6</sub>). (a) Full spectrum; (b) expansion of the aromatic region with peak assignments. Complex **9** (ca. 10%) is also present. Solvent peaks are designated by (\*).

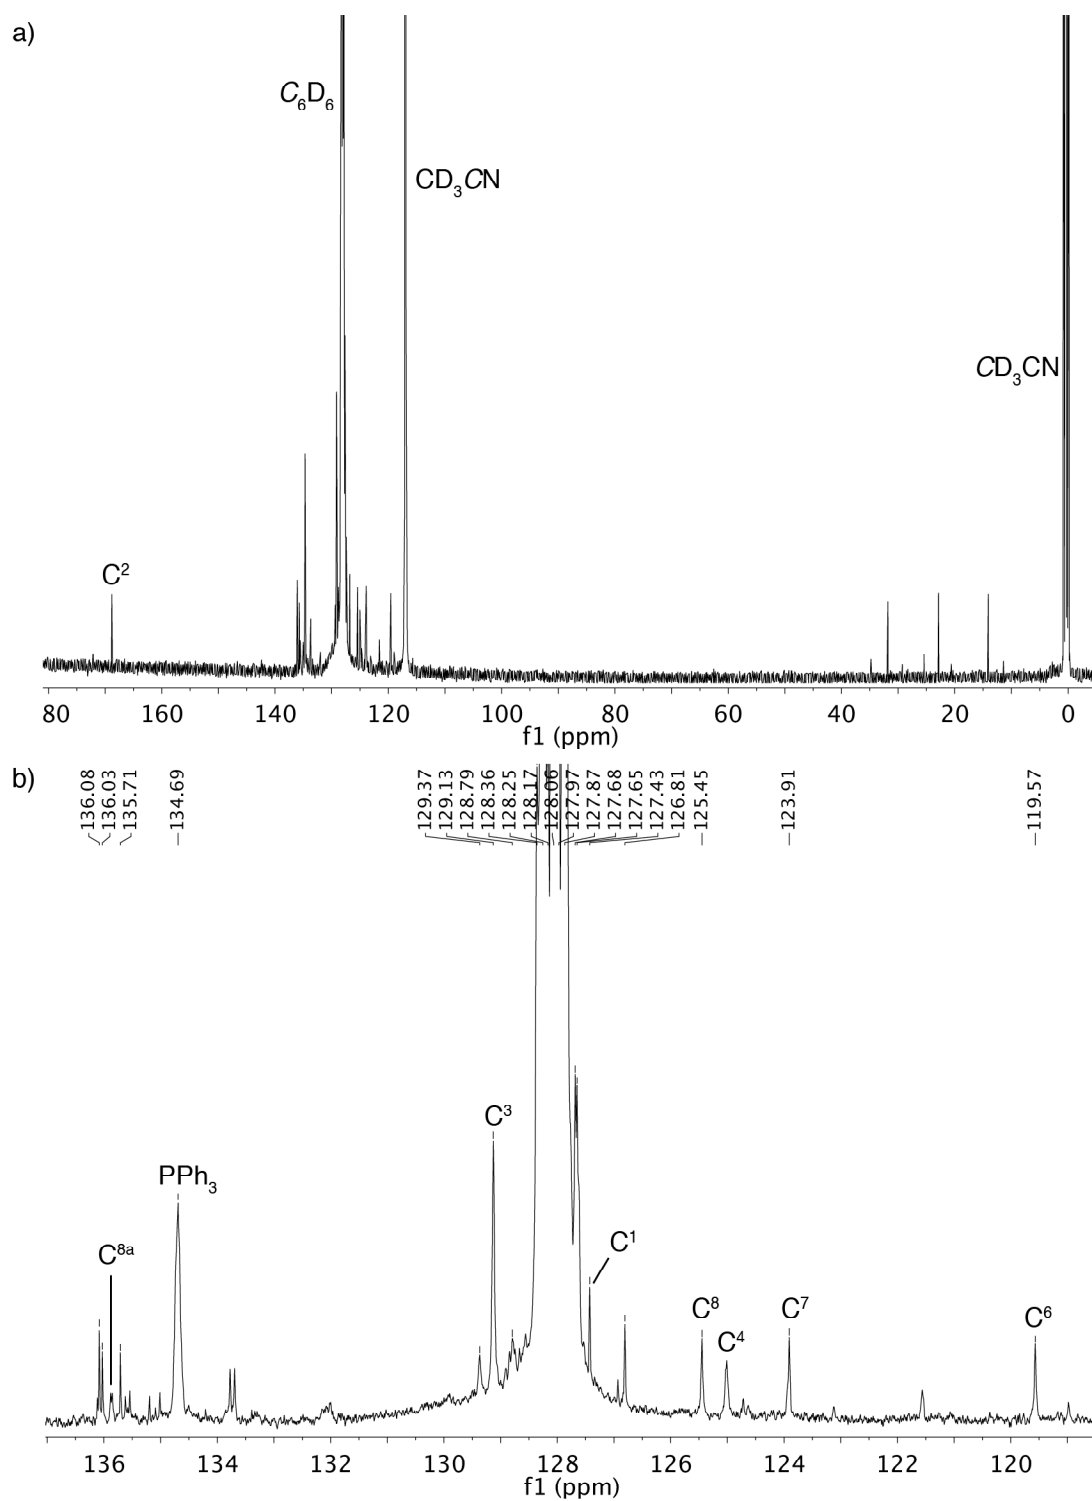

**Figure S11.**  $^{13}\text{C}\{^1\text{H}\}$  NMR spectrum of **10** (1:2  $\text{CD}_3\text{CN}-\text{C}_6\text{D}_6$ ). (a) Full spectrum; (b) expansion of the aromatic region with peak assignments. The  $\text{C}_6\text{D}_6$  solvent signal obscures peaks for  $\text{PPh}_3$ ,  $\text{C4a}$  and  $\text{C5}$ ; their locations were determined by correlation experiments.

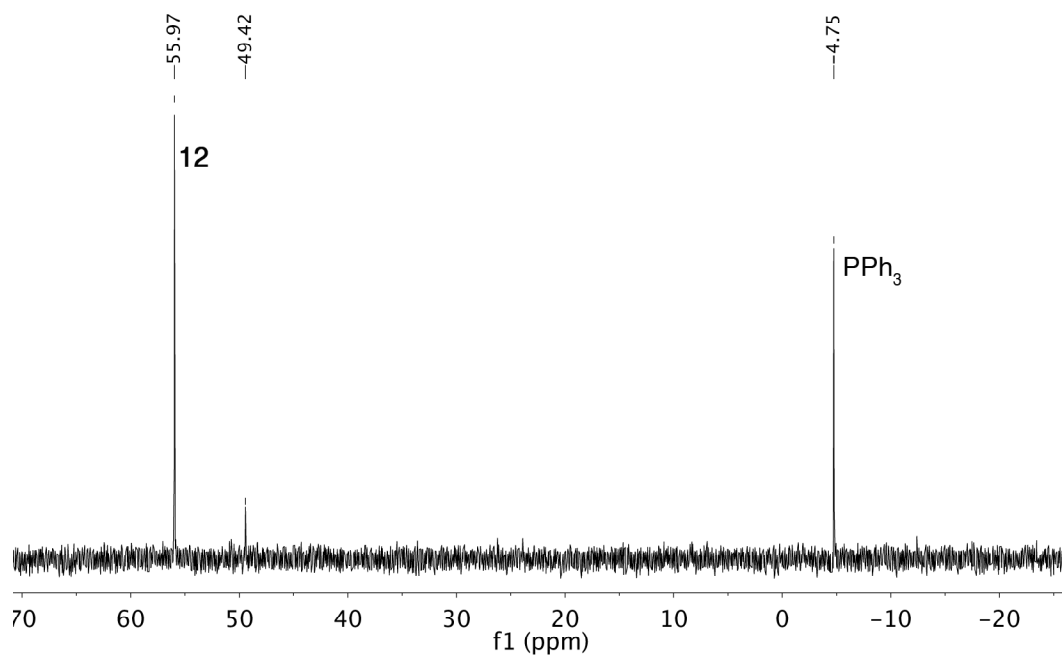

**Figure S12.**  $^{31}\text{P}\{^1\text{H}\}$  NMR spectrum revealing the in situ formation of **12** and free  $\text{PPh}_3$  on adding pyridine to **7** ( $\text{C}_5\text{H}_5\text{N}$  with  $\text{C}_6\text{D}_6$  for lock). The signal at 49.4 ppm is an unidentified side-product.

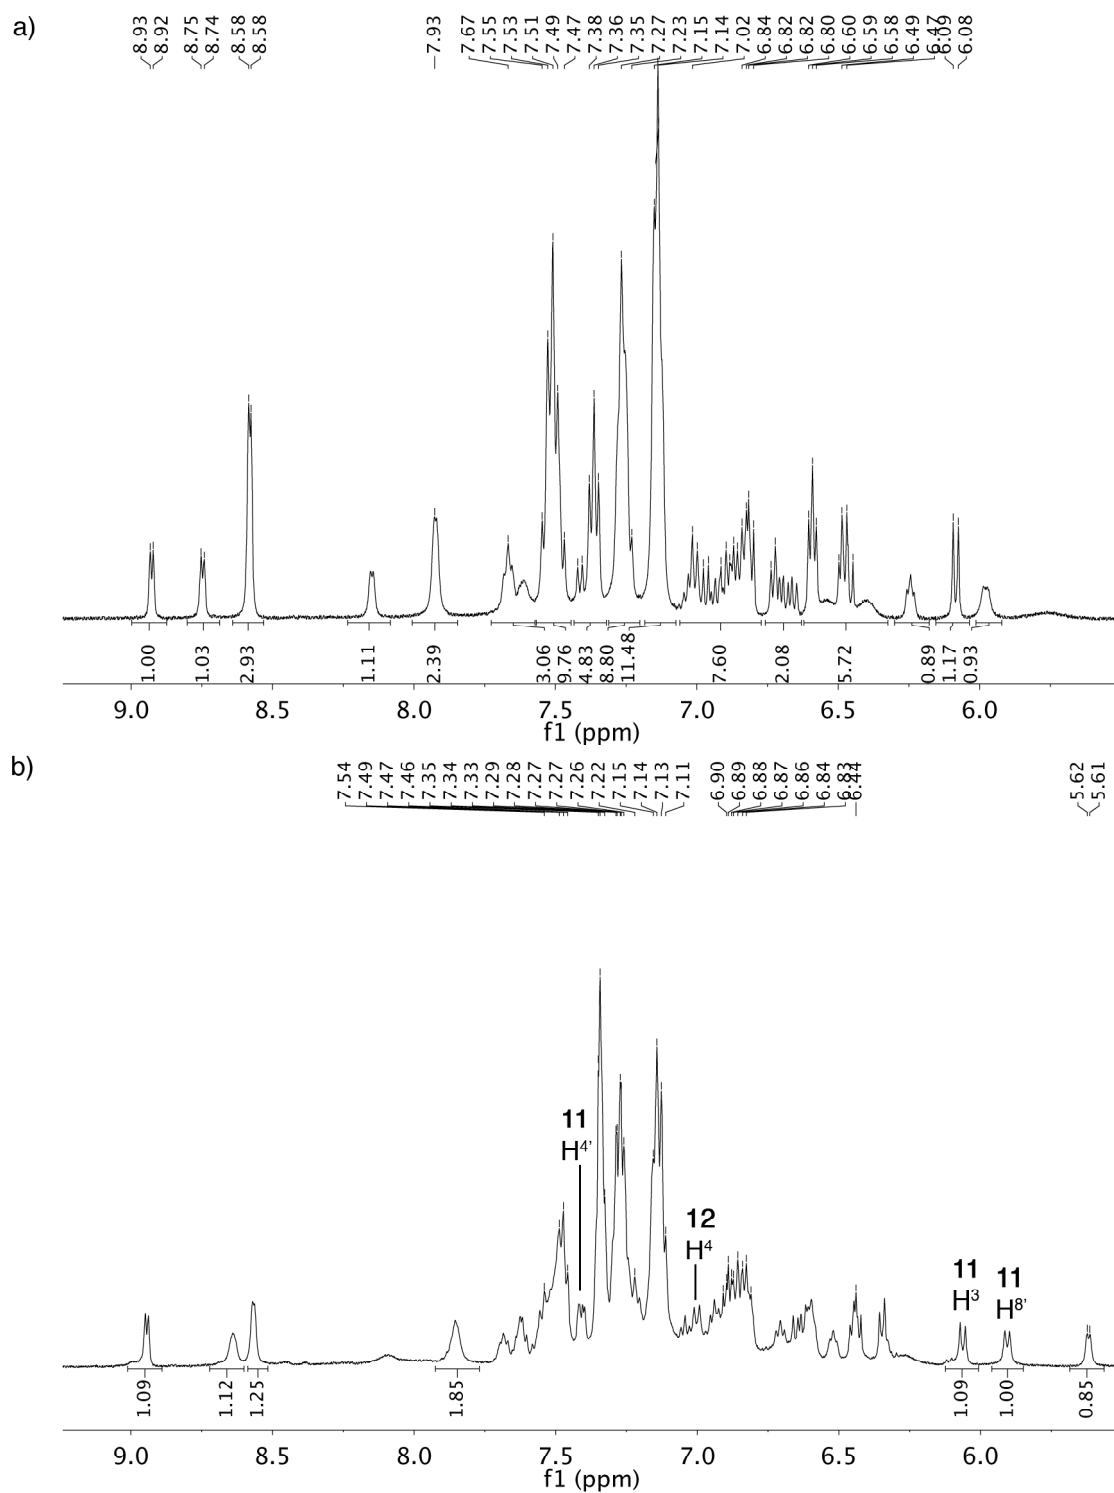

**Figure S13.**  $^1\text{H}$  NMR spectrum of the 11-12 mixture (20% 12;  $\text{CD}_2\text{Cl}_2$ ). (a) Aromatic region at 24 °C; (b) aromatic region at -20 °C. Assignments are included for resonances located via correlation experiments.

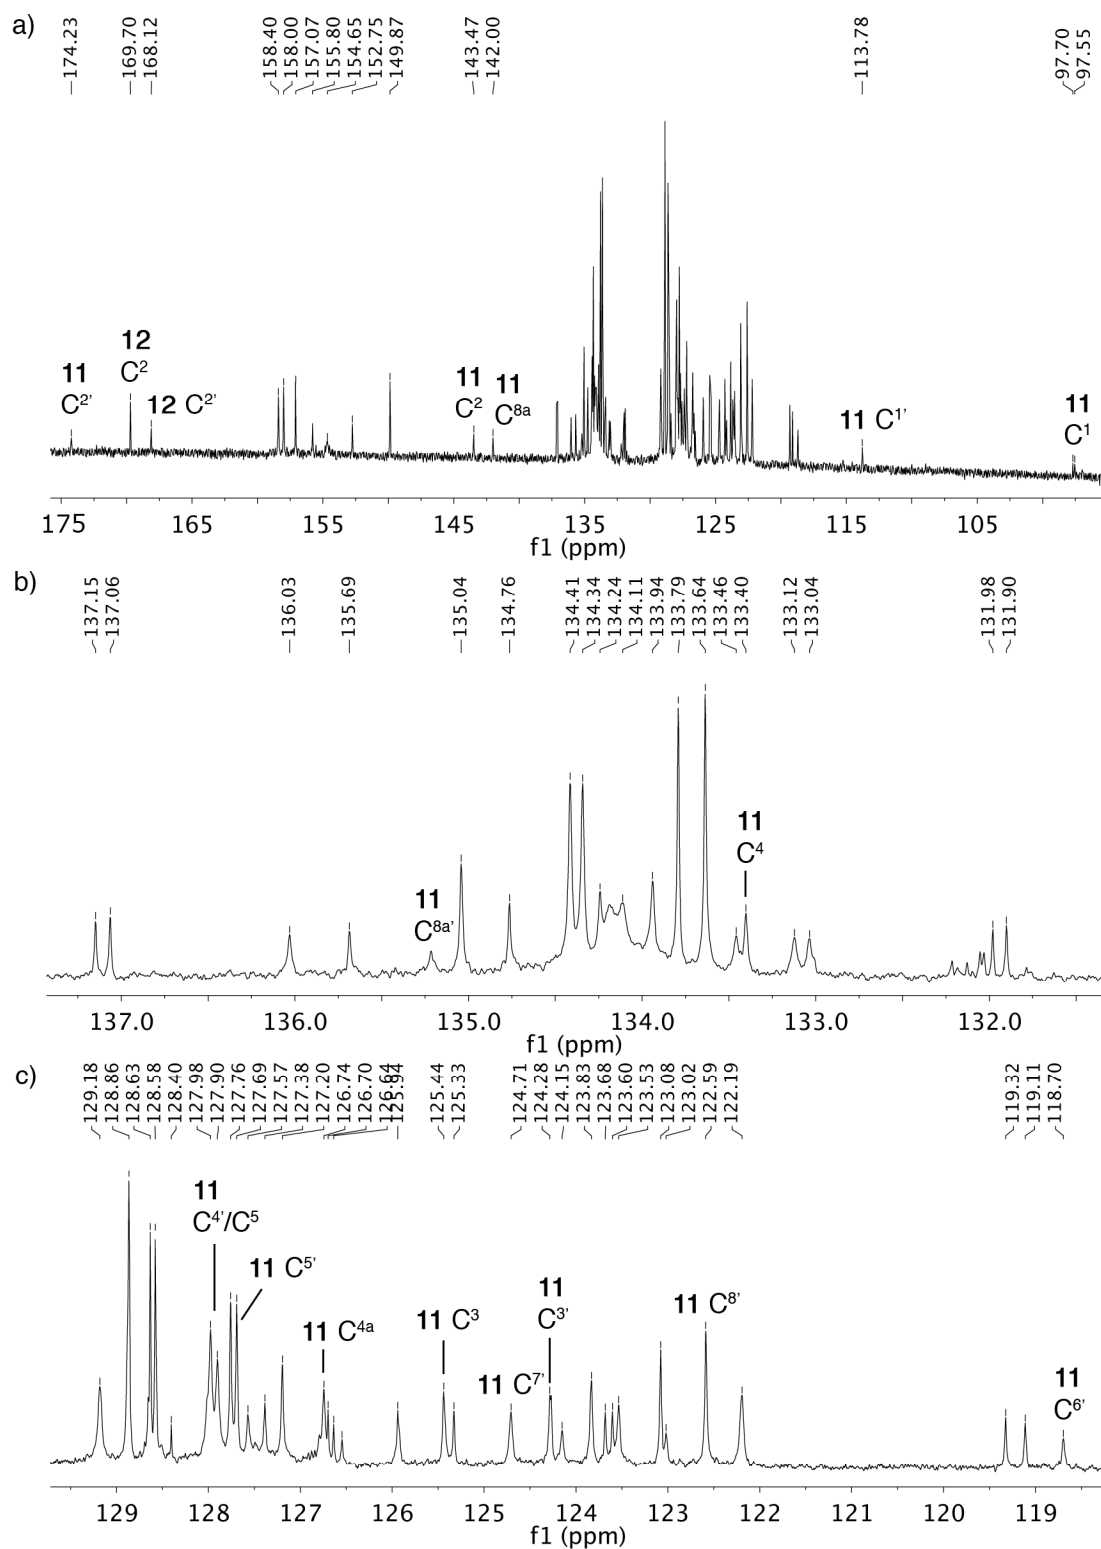

**Figure S14.** Low-temperature  $^{13}\text{C}\{^1\text{H}\}$  NMR spectrum of the **11-12** mixture (20% **12**;  $\text{CD}_2\text{Cl}_2$ ;  $-20^\circ\text{C}$ ). (a) Aromatic region; b and (c) expansions of the aromatic region. Assignments are included for resonances located via correlation experiments.

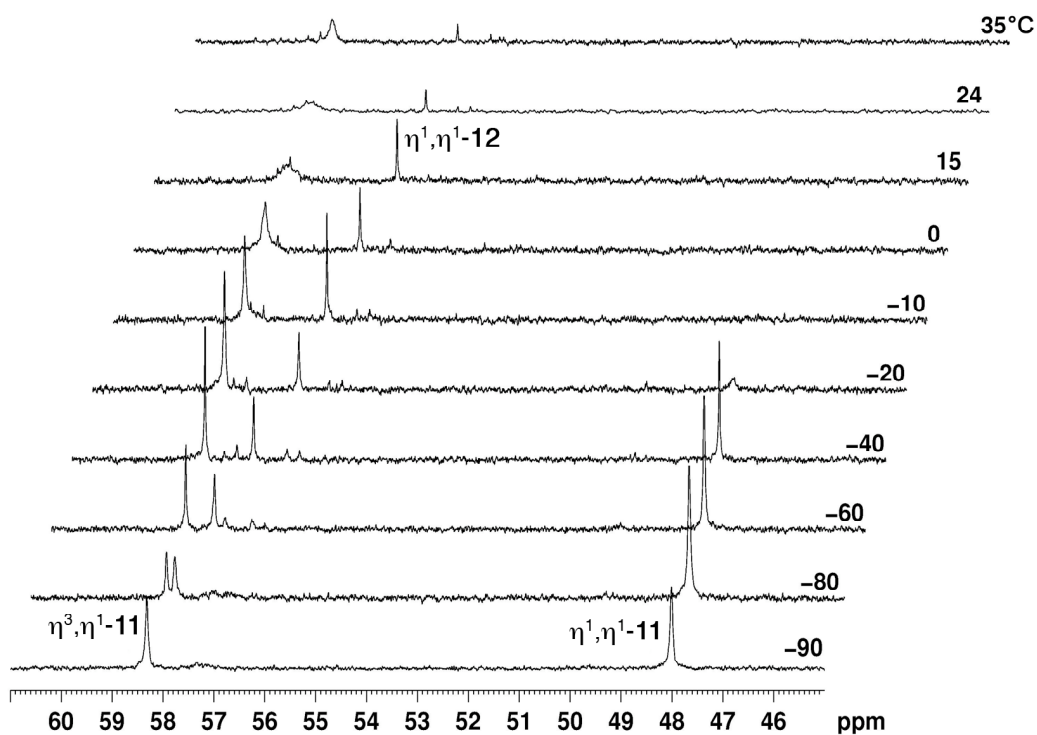

**Figure S15.** Variable-temperature  $^{31}\text{P}\{^1\text{H}\}$  NMR spectra of the **11-12** mixture (20% **12**;  $\text{CD}_2\text{Cl}_2$ ).

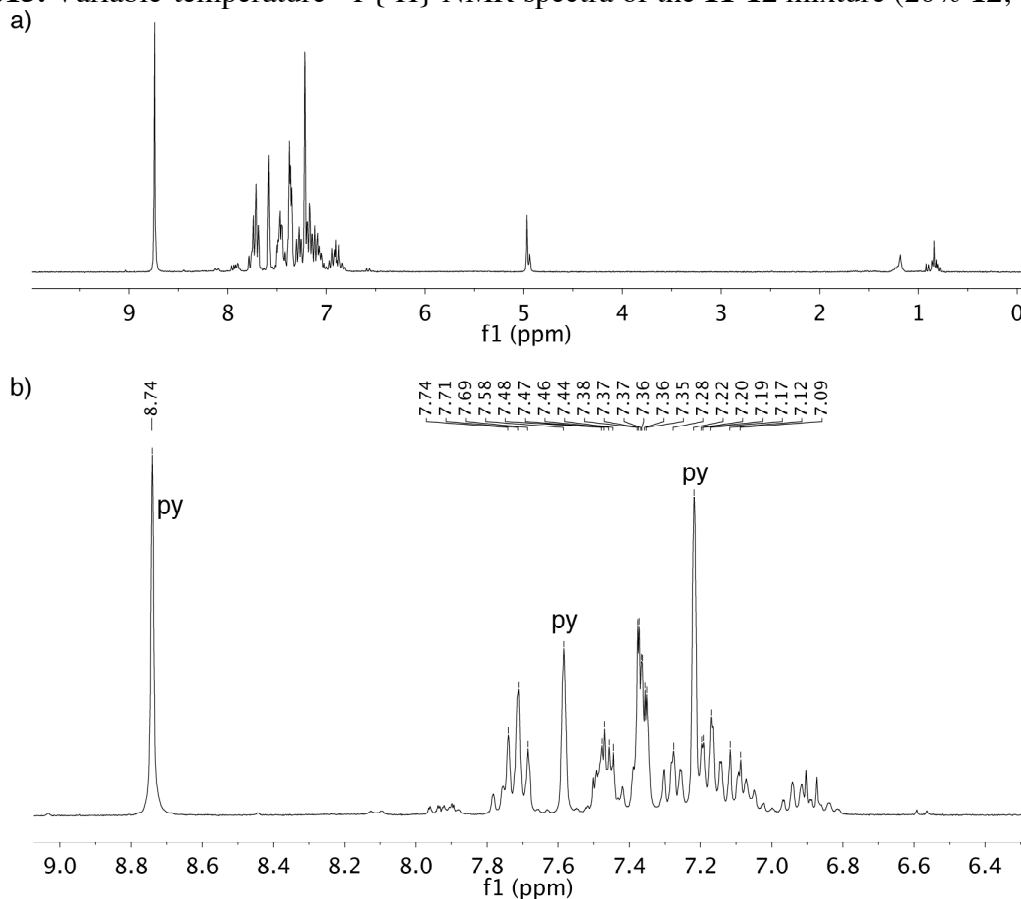

**Figure S16.**  $^1\text{H}$  NMR spectrum of **12** in  $\text{C}_5\text{D}_5\text{N}$ . (a) Aromatic region; (b) expansion of the aromatic region.



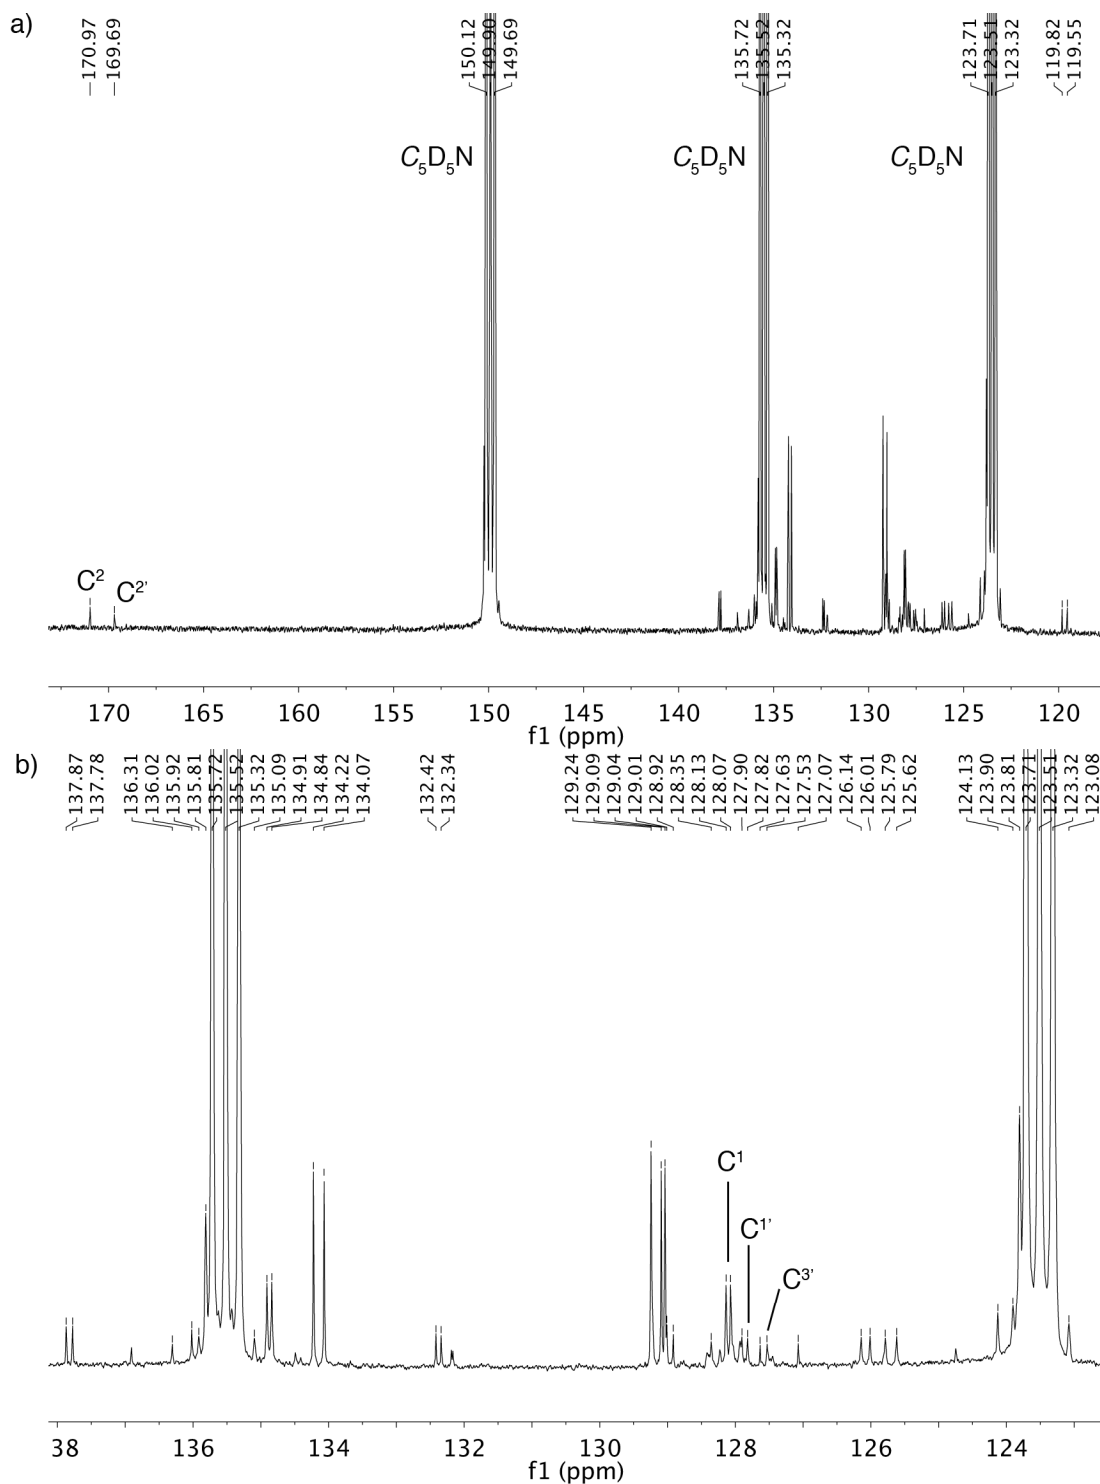

**Figure S17.**  $^{13}C\{^1H\}$  NMR spectrum of **12**, obtained by dissolving **11** in  $C_5D_5N$ . (a) Aromatic region; (b) expansion of the aromatic region. Assignments are included for signals located via correlation experiments.

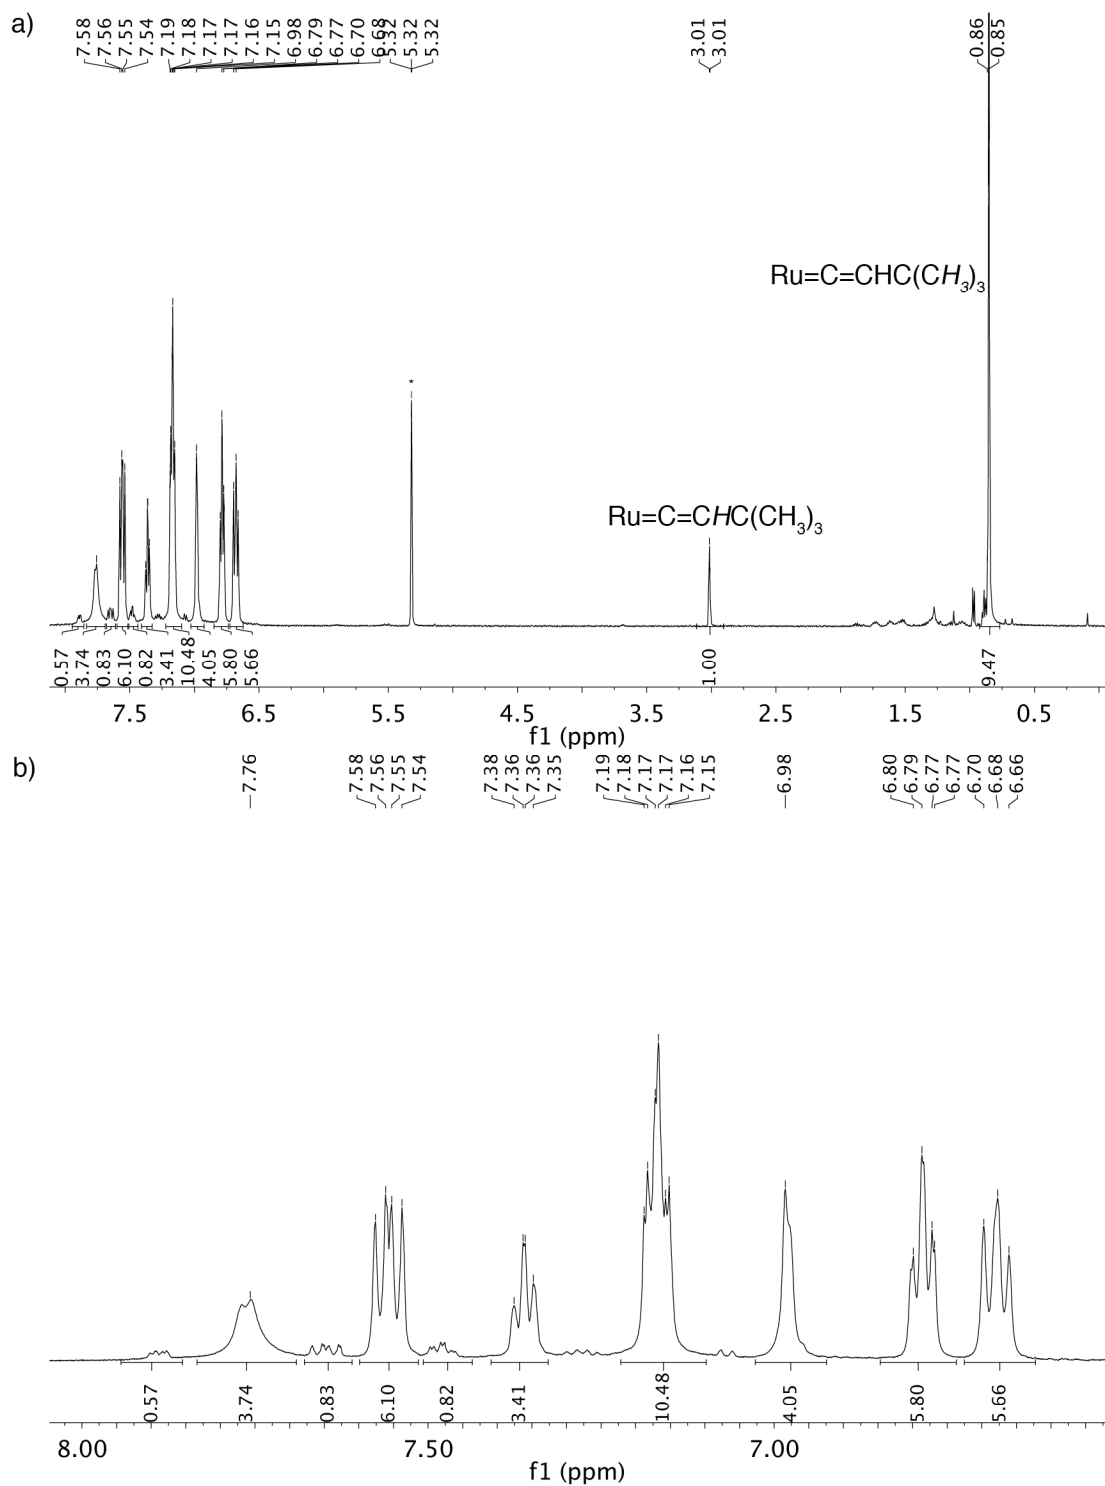

**Figure S18.**  $^1\text{H}$  NMR spectrum of **13** ( $\text{CD}_2\text{Cl}_2$ ) acquired at 24 °C. (a) Full spectrum; (b) expansion of the aromatic region. Solvent peaks are designated by (\*).

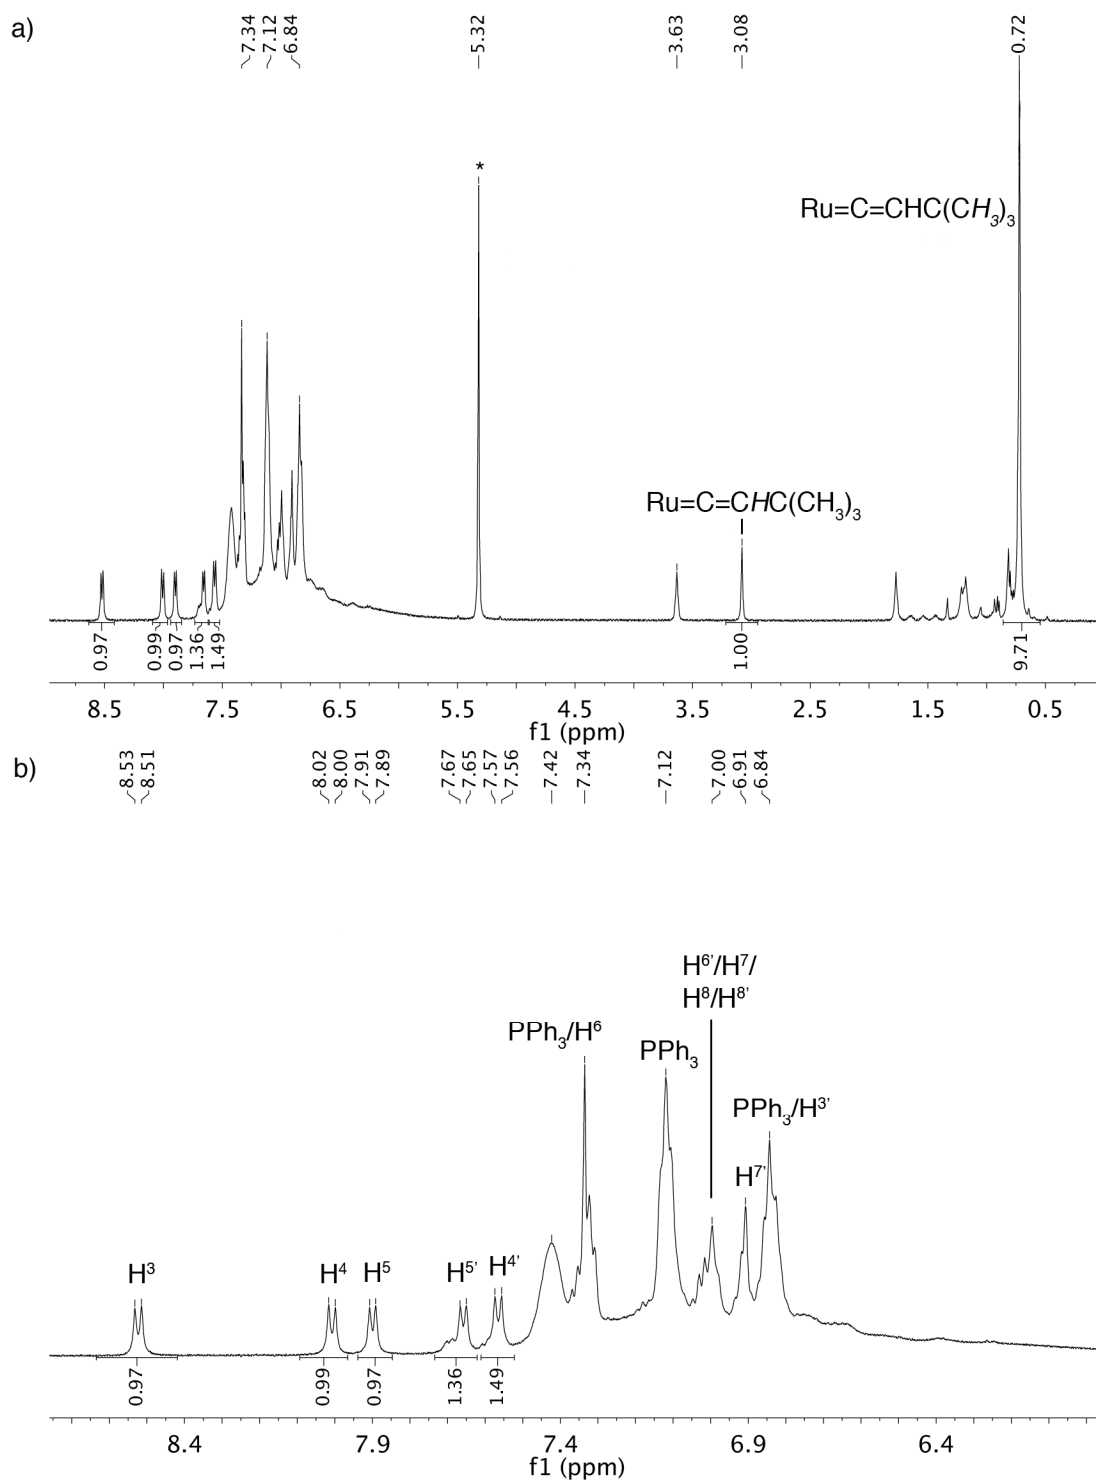

**Figure S19.** Low-temperature  $^1\text{H}$  NMR spectrum of **13** ( $\text{CD}_2\text{Cl}_2$ ,  $-60\text{ }^\circ\text{C}$ ). (a) Full spectrum; (b) expansion of the aromatic region. Solvent peaks are designated by (\*).

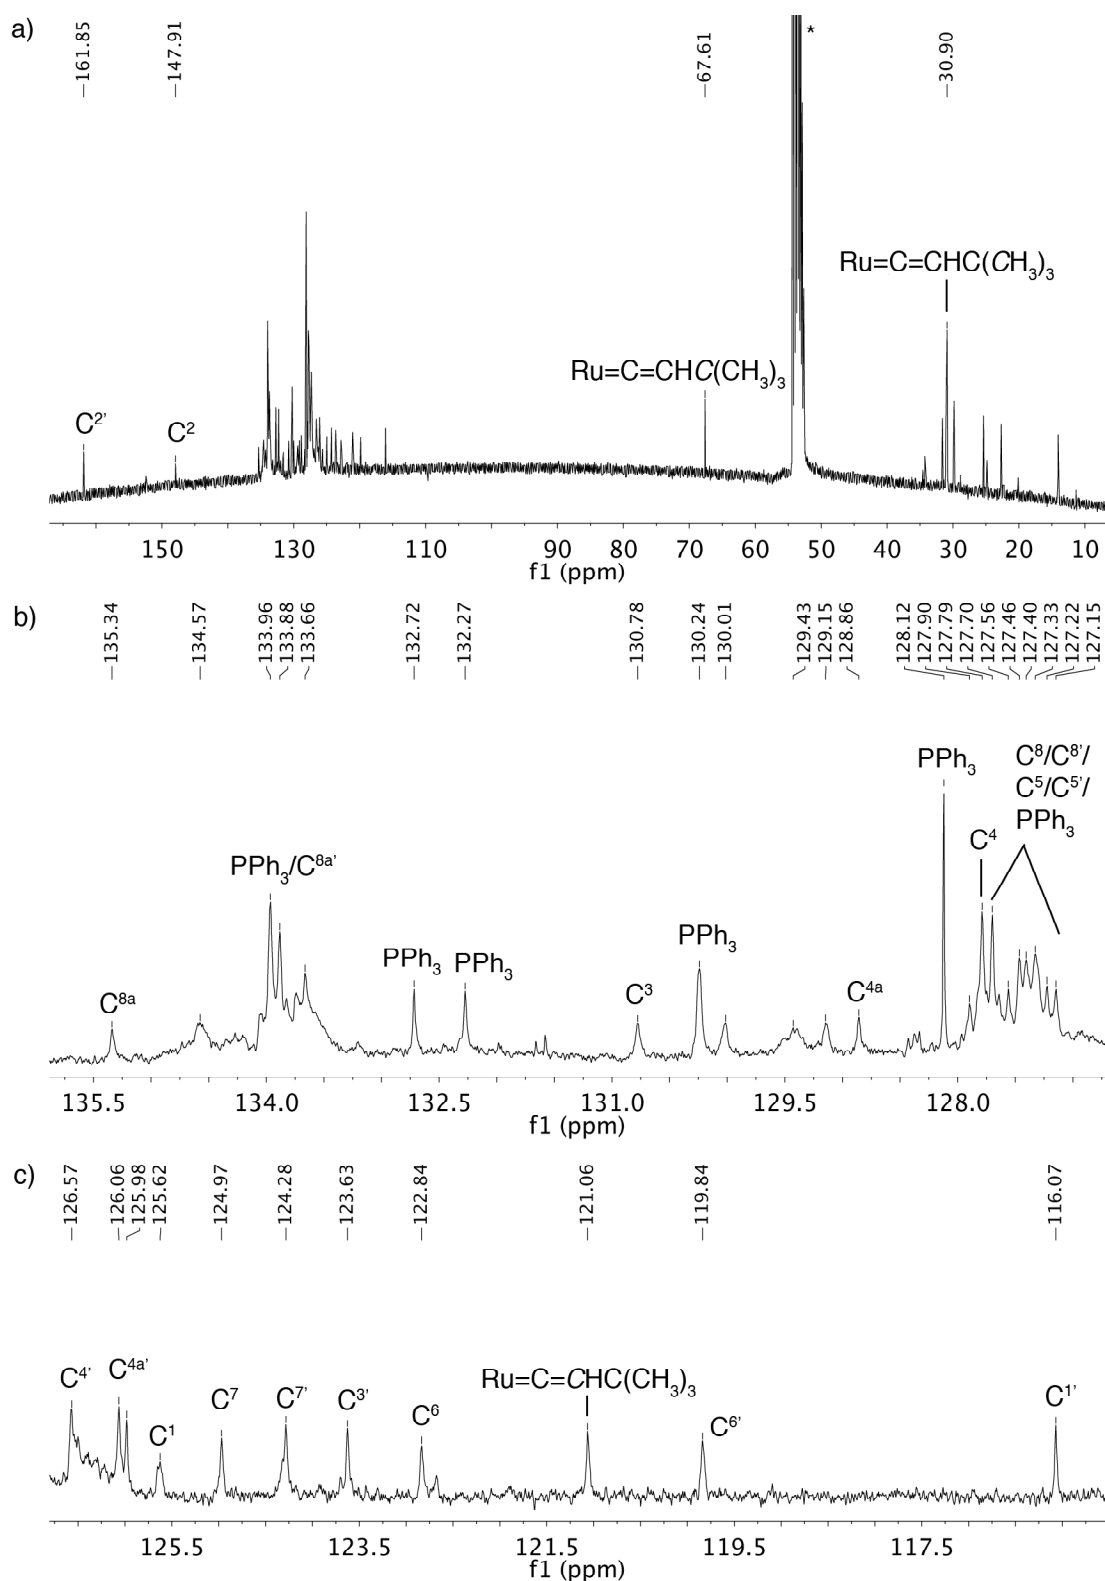

**Figure S20.**  $^{13}\text{C}\{^1\text{H}\}$  NMR spectrum of **13** ( $\text{CD}_2\text{Cl}_2$ ) acquired at  $-60^\circ\text{C}$ . (a) Full spectrum; (b) and (c), expansions of the aromatic region with signal assignments. The RuC signal ( $\delta = 347.2$  ppm) is not shown: it was located via a  $^1\text{H}$ - $^{13}\text{C}$  HMBC correlation experiment. Solvent peaks are designated by (\*).

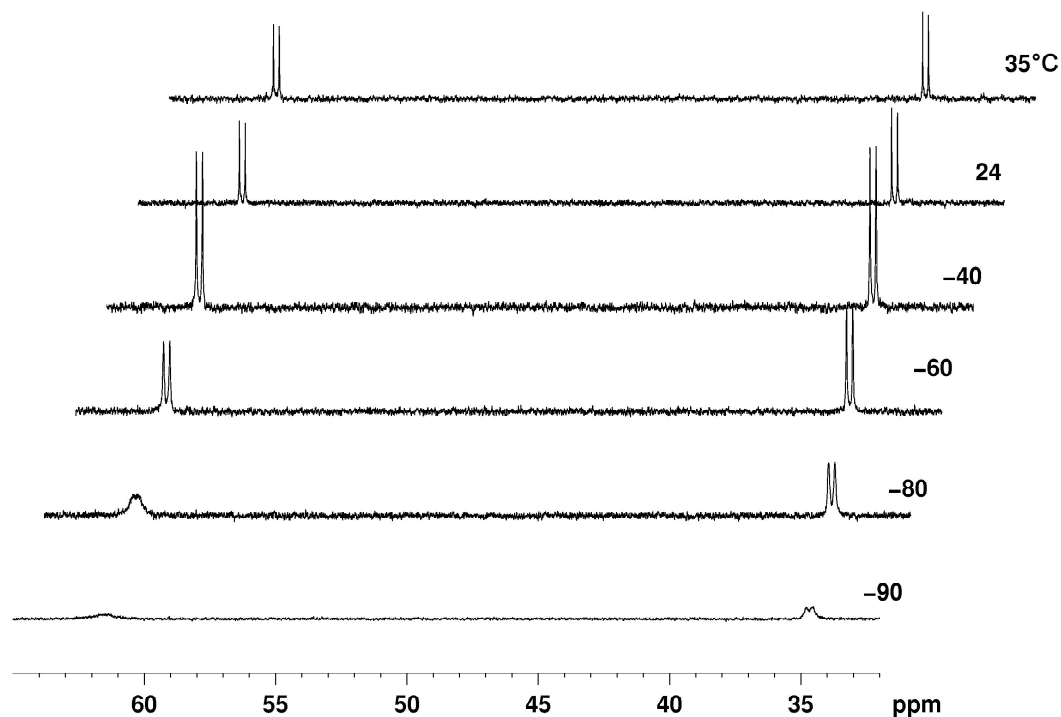

**Figure S21.** Variable-temperature  $^{31}\text{P}\{^1\text{H}\}$  NMR spectra of **13** ( $\text{CD}_2\text{Cl}_2$ ). Signal broadening at low temperatures may reflect isomerization from  $\eta^3, \eta^1$ - to  $\eta^1, \eta^1$ -BINO coordination.
